# Supplementary material for: Selective adsorption of unsaturated linear C4 molecules on the all-silica DD3R
Source: Royal Society of Chemistry journal article supplement (doi:10.1039/a909812g), 2000-01-01
Supplement: suppdata.doc [file suppdata.doc]

# **Supplementary Data of the Manuscript 9/09812G**

Table 1 Adsorption isotherm data of *trans*-but-2-ene on the all-silica DD3R

| 303 K | | 338 K | | 373 K | |
| --- | --- | --- | --- | --- | --- |
| *p*/105 Pa | *c*/m.u.c. | *p*/105 Pa | *c*/m.u.c. | *p*/105 Pa | *c*/m.u.c. |
| 0.0103 | 5.7555 | 0.0106 | 3.2551 | 0.0108 | 2.0476 |
| 0.0272 | 6.1008 | 0.0279 | 5.1026 | 0.0284 | 3.3453 |
| 0.0499 | 6.1640 | 0.0512 | 5.4543 | 0.0523 | 4.0911 |
| 0.0813 | 6.2249 | 0.0830 | 5.6539 | 0.0847 | 4.5773 |
| 0.1523 | 6.2342 | 0.1521 | 5.7809 | 0.1588 | 4.9839 |
| 0.2717 | 6.2594 | 0.2149 | 5.8400 | 0.2831 | 5.2291 |
| 0.3282 | 6.2794 | 0.2717 | 5.8600 | 0.3395 | 5.2729 |
| 0.4201 | 6.2662 | 0.3296 | 5.8822 | 0.4313 | 5.3435 |
| 0.6044 | 6.2687 | 0.4201 | 5.8965 | 0.6125 | 5.3904 |
| 0.7733 | 6.2708 | 0.4940 | 5.9120 | 0.7874 | 5.4447 |
| 0.9282 | 6.2716 | 0.5963 | 5.9143 | 0.9496 | 5.4529 |
| 1.0800 | 6.2725 | 0.7593 | 5.9307 | 1.1050 | 5.4806 |
| 1.2000 | 6.2728 | 0.9153 | 5.9408 | 1.2000 | 5.4879 |
| 1.5000 | 6.2750 | 1.0600 | 5.9403 | 1.5000 | 5.5036 |
|  |  | 1.2000 | 5.9560 |  |  |
|  |  | 1.5000 | 5.9642 |  |  |
|  |  |  |  |  |  |
| 408 K | | 438 K | | 473 K | |
| *p*/105 Pa | *c*/m.u.c. | *p*/105 Pa | *c*/m.u.c. | *p*/105 Pa | *c*/m.u.c. |
| 0.0523 | 2.6142 | 0.0536 | 1.5748 | 0.0540 | 0.7545 |
| 0.0847 | 3.2490 | 0.0868 | 2.1649 | 0.0875 | 1.1141 |
| 0.1592 | 4.0379 | 0.1630 | 3.0213 | 0.1650 | 1.7962 |
| 0.2832 | 4.5714 | 0.2900 | 3.7454 | 0.2946 | 2.5231 |
| 0.3381 | 4.7086 | 0.3480 | 3.9720 | 0.3537 | 2.7918 |
| 0.4313 | 4.8509 | 0.4406 | 4.2041 | 0.4462 | 3.0910 |
| 0.6125 | 5.0455 | 0.6234 | 4.5239 | 0.6342 | 3.5569 |
| 0.7804 | 5.1349 | 0.7944 | 4.6838 | 0.8015 | 3.8202 |
| 0.9367 | 5.2024 | 0.9538 | 4.8176 | 0.9667 | 4.0350 |
| 1.0850 | 5.2315 | 1.1000 | 4.8999 | 1.1150 | 4.1662 |
| 1.2000 | 5.2688 | 1.2000 | 4.9438 | 1.2000 | 4.2413 |
| 1.5000 | 5.3193 | 1.5000 | 5.0435 | 1.5000 | 4.4349 |

Table 2 Adsorption isotherm data of 1,3-butadiene on the all-silica DD3R

| 303 K | | 338 K | | 373 K | |
| --- | --- | --- | --- | --- | --- |
| *p*/105 Pa | *c*/m.u.c. | *p*/105 Pa | *c*/m.u.c. | *p*/105 Pa | *c*/m.u.c. |
| 0.0114 | 5.4620 | 0.0116 | 3.6766 | 0.0119 | 1.6761 |
| 0.0299 | 5.8629 | 0.0304 | 4.8479 | 0.0312 | 2.9084 |
| 0.0551 | 6.0092 | 0.0560 | 5.3089 | 0.0573 | 3.7278 |
| 0.0898 | 6.0522 | 0.0906 | 5.5678 | 0.0928 | 4.2349 |
| 0.1698 | 6.1184 | 0.1698 | 5.7555 | 0.1733 | 4.7466 |
| 0.3052 | 6.1248 | 0.3028 | 5.8752 | 0.3065 | 5.0303 |
| 0.3670 | 6.1461 | 0.3579 | 5.8843 | 0.3655 | 5.0965 |
| 0.4622 | 6.1242 | 0.4583 | 5.9243 | 0.4622 | 5.1637 |
| 0.6457 | 6.1570 | 0.6343 | 5.9351 | 0.6457 | 5.2516 |
| 0.8172 | 6.1536 | 0.8027 | 5.9625 | 0.8099 | 5.3000 |
| 0.9583 | 6.1603 | 0.9583 | 5.9874 | 0.9583 | 5.3334 |
| 1.1000 | 6.1629 | 1.1000 | 5.9901 | 1.1000 | 5.3471 |
| 1.2000 | 6.1625 | 1.2000 | 5.9895 | 1.2000 | 5.3721 |
| 1.5000 | 6.1642 | 1.5000 | 5.9998 | 1.5000 | 5.3987 |
|  |  |  |  |  |  |
| 408 K | | 438 K | | 473 K | |
| *p*/105 Pa | *c*/m.u.c. | *p*/105 Pa | *c*/m.u.c. | *p*/105 Pa | *c*/m.u.c. |
| 0.0574 | 2.2513 | 0.0588 | 1.3412 | 0.0593 | 0.7094 |
| 0.0928 | 2.8568 | 0.0951 | 1.8661 | 0.0958 | 1.0319 |
| 0.1733 | 3.6813 | 0.1775 | 2.6864 | 0.1796 | 1.6903 |
| 0.3052 | 4.2464 | 0.3126 | 3.4208 | 0.3175 | 2.3887 |
| 0.3625 | 4.4032 | 0.3731 | 3.6201 | 0.3791 | 2.6369 |
| 0.4583 | 4.5655 | 0.4681 | 3.8862 | 0.4741 | 2.9129 |
| 0.6400 | 4.7757 | 0.6513 | 4.1901 | 0.6627 | 3.3599 |
| 0.8027 | 4.8651 | 0.8172 | 4.3956 | 0.8244 | 3.6071 |
| 0.9496 | 4.9556 | 0.9669 | 4.5021 | 0.9799 | 3.8147 |
| 1.0850 | 4.9860 | 1.1000 | 4.6061 | 1.1150 | 3.9341 |
| 1.2000 | 5.0436 | 1.2000 | 4.6515 | 1.2000 | 4.0237 |
| 1.5000 | 5.1059 | 1.5000 | 4.7814 | 1.5000 | 4.2186 |
